# Supplementary material for: Simultaneous Transcriptome Analysis of Sorghum and Bipolaris sorghicola by Using RNA-seq in Combination with De Novo Transcriptome Assembly
Source: PubMed Central journal article supplement (PMC3640049; doi:10.1371/journal.pone.0062460), 2013-04-30
Supplement: pone.0062460.s002.pdf [file pone.0062460.s002.pdf]

Table S1 Alignment of sequenced reads

| Sample   | Time | No. of reads | Unique non-junction hit | %    | Unique junction hit | %    | Multi hit | %   | Unaligned | %   |
|----------|------|--------------|-------------------------|------|---------------------|------|-----------|-----|-----------|-----|
| control  | 0h   | 38,945,070   | 24,812,328              | 63.7 | 11,107,457          | 28.5 | 1,162,174 | 3.0 | 1,863,111 | 4.8 |
| mock     | 12h  | 30,520,120   | 19,350,912              | 63.4 | 8,610,767           | 28.2 | 1,029,141 | 3.4 | 1,529,300 | 5.0 |
| mock     | 24h  | 36,380,811   | 23,269,440              | 64.0 | 10,487,302          | 28.8 | 937,600   | 2.6 | 1,686,469 | 4.6 |
| infected | 12h  | 32,786,461   | 20,924,199              | 63.8 | 9,275,130           | 28.3 | 1,028,299 | 3.1 | 1,558,833 | 4.8 |
| infected | 24h  | 33,277,817   | 20,948,479              | 63.0 | 9,792,515           | 29.4 | 924,214   | 2.8 | 1,612,609 | 4.8 |
