# Supplementary material for: Simultaneous Transcriptome Analysis of Sorghum and Bipolaris sorghicola by Using RNA-seq in Combination with De Novo Transcriptome Assembly
Source: PubMed Central journal article supplement (PMC3640049; doi:10.1371/journal.pone.0062460), 2013-04-30
Supplement: pone.0062460.s003.pdf [file pone.0062460.s003.pdf]

Table S2

Statistically over-represented Pfam domains in pathogen (*Bipolaris sorghicola*)-induced genes

| Pfam domain     | Function                                           | Number of genes |
|-----------------|----------------------------------------------------|-----------------|
| Pkinase         | Protein kinase domain                              | 65              |
| p450            | Cytochrome P450                                    | 29              |
| ABC_tran        | ATP-binding domain of ABC transporters             | 15              |
| B_lectin        | D-mannose binding lectin                           | 14              |
| GST_N_3         | Glutathione S-transferase, N-terminal domain       | 12              |
| GST_C           | Glutathione S-transferase, C-terminal domain       | 11              |
| Thaumatoin      | Thaumatoin                                         | 11              |
| S_locus_glycop  | S-locus glycoprotein family                        | 10              |
| WRKY            | WRKY DNA -binding domain                           | 10              |
| Stress-antifung | Domain of unknown function                         | 9               |
| Lectin_legB     | Leguminous lectin family                           | 9               |
| Glyco_hydro_18  | Glycoside hydrolase family 18                      | 7               |
| Glyco_hydro_19  | Glycoside hydrolase family 19                      | 7               |
| Chal_sti_synt_C | Chalcone and stilbene synthases, C-terminal domain | 7               |
| Chal_sti_synt_N | Chalcone and stilbene synthases, N-terminal domain | 7               |
| DUF4009         | Domain of unknown function                         | 7               |
| PDR_assoc       | Plant PDR ABC transporter associated               | 6               |
| Bet_v_1         | Bet v I allergen                                   | 6               |
| Chitin_bind_1   | Carbohydrate-binding module                        | 6               |
| Methyltransf_2  | O-methyltransferase                                | 6               |
