# Supplementary material for: Simultaneous Transcriptome Analysis of Sorghum and Bipolaris sorghicola by Using RNA-seq in Combination with De Novo Transcriptome Assembly
Source: PubMed Central journal article supplement (PMC3640049; doi:10.1371/journal.pone.0062460), 2013-04-30
Supplement: pone.0062460.s004.pdf [file pone.0062460.s004.pdf]

Table S3 Statistically over-represented TFBSs in pathogen (*Bipolaris sorghicola*)-induced genes

| TFBS in PLACE database | Number | %    |
|------------------------|--------|------|
| -300ELEMENT            | 314    | 31.5 |
| ABRELATERD1            | 478    | 48   |
| ABRERATCAL             | 412    | 41.4 |
| ACGTATERD1             | 650    | 65.3 |
| ACGTCBOX               | 91     | 9.1  |
| ACGTOSGLUB1            | 72     | 7.2  |
| ARR1AT                 | 884    | 88.8 |
| ASF1MOTIFCAMV          | 539    | 54.1 |
| BIHD1OS                | 591    | 59.3 |
| BOXLCOREDPCAL          | 238    | 23.9 |
| CAATBOX1               | 880    | 88.4 |
| CACTFTPPCA1            | 922    | 92.6 |
| CGACGOSAMY3            | 493    | 49.5 |
| CURECORECR             | 638    | 64.1 |
| DOFCOREZM              | 918    | 92.2 |
| DPBFCOREDCCDC3         | 538    | 54   |
| EBOXBNNAPA             | 810    | 81.3 |
| ECCRCAH1               | 510    | 51.2 |
| ELRECOREPCRP1          | 274    | 27.5 |
| GATABOX                | 818    | 82.1 |
| GT1CONSENSUS           | 844    | 84.7 |
| GTGANTG10              | 890    | 89.4 |
| HEXMOTIFTAH3H4         | 168    | 16.9 |
| MYB2CONSENSUSAT        | 461    | 46.3 |
| MYBCORE                | 656    | 65.9 |
| MYCCONSUSAT            | 810    | 81.3 |
| P1BS                   | 108    | 10.8 |
| POLASIG3               | 400    | 40.2 |
| POLLEN1LELAT52         | 777    | 78   |
| QELEMENTZM13           | 175    | 17.6 |
| RAV1AAT                | 587    | 58.9 |
| RHERPATEXPA7           | 452    | 45.4 |
| ROOTMOTIFTAPOX1        | 665    | 66.8 |
| RYREPEATBNNAPA         | 311    | 31.2 |
| RYREPEATGMGY2          | 190    | 19.1 |
| RYREPEATLEGUMINBOX     | 247    | 24.8 |
| SEF1MOTIF              | 211    | 21.2 |
| SEF4MOTIFGM7S          | 496    | 49.8 |
| SORLIP1AT              | 605    | 60.7 |
| SORLREP3AT             | 48     | 4.8  |
| T/GBOXATPIN2           | 152    | 15.3 |
| TATABOX2               | 256    | 25.7 |
| TATABOX3               | 114    | 11.4 |
| TATABOX4               | 246    | 24.7 |
| TATABOX5               | 517    | 51.9 |
| TATABOXOSPAL           | 244    | 24.5 |
| TATAPVTRNALEU          | 123    | 12.3 |
| TGACGTVMAMY            | 168    | 16.9 |
| WBBOXPCWRKY1           | 213    | 21.4 |
| WBOXATNPR1             | 655    | 65.8 |
| WBOXHVIS01             | 558    | 56   |
| WBOXNTCHN48            | 358    | 35.9 |
| WBOXNTERF3             | 764    | 76.7 |
| WRKY71OS               | 903    | 90.7 |
