# Supplementary material for: Simultaneous Transcriptome Analysis of Sorghum and Bipolaris sorghicola by Using RNA-seq in Combination with De Novo Transcriptome Assembly
Source: PubMed Central journal article supplement (PMC3640049; doi:10.1371/journal.pone.0062460), 2013-04-30
Supplement: pone.0062460.s005.pdf [file pone.0062460.s005.pdf]

Table S4

Pathogen (*Bipolaris sorghicola*)-induced genes in *Sorghum bicolor* encoding enzymes for secondary metabolites

| Family             | Transcript    | RPKM    |        |          | Annotation                                                                                           |
|--------------------|---------------|---------|--------|----------|------------------------------------------------------------------------------------------------------|
|                    |               | Conrtol | Mock   | Infected |                                                                                                      |
| PAL                | Sb06g022750.1 | 1.33    | 2.04   | 4.36     | Phenylalanine ammonia-lyase OS=Triticum aestivum GN=PAL PE=3 SV=1                                    |
| PAL                | Sb04g026560.1 | 1.55    | 4.70   | 6.08     | Phenylalanine ammonia-lyase OS=Oryza sativa subsp. indica GN=ZB8 PE=3 SV=1                           |
| C4H                | Sb02g010910.1 | 13.10   | 34.15  | 68.03    | Trans-cinnamate 4-monooxygenase OS=Glycyrrhiza echinata GN=CYP73A14 PE=2 SV=1                        |
| C4H                | Sb03g038160.1 | 0.29    | 1.91   | 3.30     | Trans-cinnamate 4-monooxygenase OS=Catharanthus roseus GN=CYP73A4 PE=2 SV=1                          |
| C4H                | Sb04g017460.1 | 0.02    | 0.00   | 0.34     | Trans-cinnamate 4-monooxygenase OS=Glycyrrhiza echinata GN=CYP73A14 PE=2 SV=1                        |
| 4CL                | Sb04g005210.1 | 14.67   | 21.35  | 38.39    | Probable 4-coumarate--CoA ligase 3 OS=Oryza sativa subsp. japonica GN=4CL3 PE=2 SV=1                 |
| 4CL                | Sb01g048200.1 | 4.41    | 5.89   | 14.43    | 4-coumarate--CoA ligase-like 4 OS=Oryza sativa subsp. japonica GN=4CLL4 PE=2 SV=1                    |
| 4CL                | Sb07g007810.1 | 3.27    | 6.25   | 19.57    | Probable 4-coumarate--CoA ligase 1 OS=Oryza sativa subsp. japonica GN=4CL1 PE=2 SV=2                 |
| CHS                | Sb05g020230.1 | 0.05    | 0.37   | 46.81    | Chalcone synthase 6 OS=Sorghum bicolor GN=CHS6 PE=3 SV=1                                             |
| CHS                | Sb05g020200.1 | 0.02    | 0.00   | 20.34    | Chalcone synthase 1 OS=Sorghum bicolor GN=CHS1 PE=3 SV=1                                             |
| CHS                | Sb05g020160.1 | 0.09    | 0.06   | 23.45    | Chalcone synthase 4 OS=Sorghum bicolor GN=CHS4 PE=3 SV=1                                             |
| CHS                | Sb05g020210.1 | 0.02    | 0.00   | 13.86    | Chalcone synthase 3 OS=Sorghum bicolor GN=CHS3 PE=3 SV=1                                             |
| CHS                | Sb05g020220.1 | 0.02    | 0.04   | 9.17     | Chalcone synthase 7 OS=Sorghum bicolor GN=CHS7 PE=3 SV=1                                             |
| CHS                | Sb05g020150.1 | 6.86    | 7.64   | 58.56    | Chalcone synthase 5 OS=Sorghum bicolor GN=CHS5 PE=3 SV=1                                             |
| CHS                | Sb07g004700.1 | 0.00    | 0.00   | 20.33    | Chalcone synthase 1 OS=Oryza sativa subsp. japonica GN=CHS1 PE=2 SV=1                                |
| CHI                | Sb08g002620.2 | 1.57    | 9.48   | 134.42   | chalcone-flavanone isomerase-like proetin [Arabidopsis thaliana]                                     |
| CHI                | Sb08g002620.1 | 1.22    | 7.04   | 103.65   | chalcone-flavanone isomerase-like proetin [Arabidopsis thaliana]                                     |
| FNSII              | Sb02g000220.1 | 1.38    | 0.83   | 40.47    | Cytochrome P450 93A3 OS=Glycine max GN=CYP93A3 PE=2 SV=1                                             |
| F3'H               | Sb04g024710.1 | 0.12    | 0.50   | 28.21    | Flavonoid 3'-monooxygenase OS=Petunia hybrida GN=CYP75B2 PE=2 SV=1                                   |
| F3'H               | Sb04g024730.1 | 0.48    | 0.87   | 5.30     | Flavonoid 3'-monooxygenase OS=Petunia hybrida GN=CYP75B2 PE=2 SV=1                                   |
| F3'H               | Sb04g024750.1 | 0.45    | 0.32   | 1.82     | Flavonoid 3'-monooxygenase OS=Arabidopsis thaliana GN=CYP75B1 PE=1 SV=1                              |
| ANR                | Sb06g029550.1 | 0.10    | 0.08   | 80.14    | Anthocyanidin reductase OS=Arabidopsis thaliana GN=BAN PE=1 SV=2                                     |
| Methyl transferase | Sb10g027360.1 | 0.02    | 0.12   | 77.05    | 5-pentadecatrienyl resorcinol O-methyltransferase OS=Sorghum bicolor GN=OMT3 PE=1 SV=1               |
| Methyl transferase | Sb07g004690.1 | 0.06    | 0.20   | 153.96   | Eugenol O-methyltransferase OS=Sorghum bicolor GN=EOMT PE=1 SV=1                                     |
| Methyl transferase | Sb10g027340.1 | 0.00    | 0.00   | 29.73    | 5-pentadecatrienyl resorcinol O-methyltransferase OS=Sorghum bicolor GN=OMT3 PE=1 SV=1               |
| Methyl transferase | Sb05g026710.1 | 0.06    | 0.11   | 17.33    | O-methyltransferase ZRP4 OS=Zea mays GN=ZRP4 PE=2 SV=1                                               |
| Methyl transferase | Sb07g004710.1 | 0.02    | 0.03   | 30.28    | Eugenol O-methyltransferase OS=Sorghum bicolor GN=EOMT PE=1 SV=1                                     |
| Methyl transferase | CUFF.2703.1   | 0.00    | 0.02   | 27.35    | 5-pentadecatrienyl resorcinol O-methyltransferase OS=Sorghum bicolor GN=OMT3 PE=1 SV=1               |
| Methyl transferase | Sb01g042580.1 | 0.65    | 1.82   | 3.05     | Homocysteine S-methyltransferase 1 OS=Zea mays GN=HMT-1 PE=2 SV=1                                    |
| Methyl transferase | Sb03g012610.1 | 0.07    | 0.03   | 1.17     | S-adenosyl-L-methionine-dependent methyltransferase-like protein [Arabidopsis thaliana]              |
| Methyl transferase | Sb03g032930.1 | 15.69   | 10.77  | 34.09    | S-adenosyl-L-methionine-dependent methyltransferase domain-containing protein [Arabidopsis thaliana] |
| Methyl transferase | Sb04g003110.1 | 152.55  | 236.35 | 347.61   | Benzoate carboxyl methyltransferase OS=Antirrhinum majus GN=BAMT PE=1 SV=1                           |
| Methyl transferase | Sb01g034010.1 | 18.94   | 22.50  | 28.05    | Probable methyltransferase PMT2 OS=Arabidopsis thaliana GN=At1g26850 PE=1 SV=2                       |
| CCR                | Sb07g021680.1 | 32.99   | 33.70  | 53.07    | cinnamoyl coa reductase 1 [Arabidopsis thaliana]                                                     |
| CAD                | Sb06g001430.1 | 0.23    | 0.33   | 1.58     | Probable cinnamyl alcohol dehydrogenase 6 OS=Oryza sativa subsp. japonica GN=CAD6 PE=2 SV=2          |
| Dirigent           | Sb05g008780.1 | 0.61    | 0.37   | 51.98    | disease resistance-responsive, dirigent domain-containing protein [Arabidopsis thaliana]             |
| Dirigent           | Sb05g008770.1 | 0.00    | 0.00   | 12.83    | Disease resistance-responsive (dirigent-like protein) family protein [Arabidopsis thaliana]          |
| Dirigent           | Sb05g008800.1 | 0.09    | 0.00   | 26.54    | disease resistance-responsive, dirigent domain-containing protein [Arabidopsis thaliana]             |
| Dirigent           | Sb05g008790.1 | 0.39    | 0.10   | 26.77    | Disease resistance-responsive (dirigent-like protein) family protein [Arabidopsis thaliana]          |
| Dirigent           | Sb09g001860.1 | 0.61    | 0.74   | 9.70     | -                                                                                                    |
| Dirigent           | Sb03g041610.1 | 5.12    | 2.04   | 25.43    | disease resistance-responsive, dirigent domain-containing protein [Arabidopsis thaliana]             |
