# Supplementary material for: Simultaneous Transcriptome Analysis of Sorghum and Bipolaris sorghicola by Using RNA-seq in Combination with De Novo Transcriptome Assembly
Source: PubMed Central journal article supplement (PMC3640049; doi:10.1371/journal.pone.0062460), 2013-04-30
Supplement: pone.0062460.s006.pdf [file pone.0062460.s006.pdf]

Table S5

Pathogen (*Bipolaris sorghicola*)-induced genes in *Sorghum bicolor* encoding pathogenesis-related (PR) proteins

| Family                  | Transcript      | RPKM    |        |          | Annotation                                                                             |
|-------------------------|-----------------|---------|--------|----------|----------------------------------------------------------------------------------------|
|                         |                 | Control | Mock   | Infected |                                                                                        |
| PR-1 like               | Sb02g002150.1   | 0.08    | 0.04   | 314.65   | Pathogenesis-related protein PRB1-2 OS=Hordeum vulgare PE=2 SV=1                       |
| PR-1 like               | Sb10g001940.1   | 36.97   | 52.98  | 152.78   | Pathogenesis-related protein PRMS OS=Zea mays GN=PRMS PE=2 SV=1                        |
| $\beta$ -1, 3-Glucanase | Sb03g045460.1   | 1.32    | 4.25   | 336.68   | Glucan endo-1,3-beta-glucosidase, acidic isoform OS=Zea mays PE=2 SV=1                 |
| $\beta$ -1, 3-Glucanase | Sb08g019670.1   | 6.88    | 9.20   | 129.66   | Glucan endo-1,3-beta-glucosidase GII OS=Hordeum vulgare PE=1 SV=1                      |
| $\beta$ -1, 3-Glucanase | Sb03g045450.1   | 1.02    | 0.85   | 5.73     | Glucan endo-1,3-beta-glucosidase, acidic isoform OS=Zea mays PE=2 SV=1                 |
| $\beta$ -1, 3-Glucanase | Sb03g045490.1   | 125.57  | 118.02 | 150.40   | Glucan endo-1,3-beta-glucosidase GII OS=Hordeum vulgare PE=1 SV=1                      |
| Chitinase               | Sb06g021250.1   | 7.15    | 13.44  | 173.82   | Endochitinase A OS=Zea mays PE=1 SV=1                                                  |
| Chitinase               | Sb06g021240.1   | 3.34    | 6.36   | 33.57    | Endochitinase A OS=Zea mays PE=1 SV=1                                                  |
| Chitinase               | Sb06g021260.1   | 0.00    | 0.21   | 6.41     | Endochitinase A OS=Zea mays PE=1 SV=1                                                  |
| Chitinase               | Sb04g025430.1   | 1.55    | 2.52   | 17.10    | Chitinase 6 OS=Oryza sativa subsp. japonica GN=Cht6 PE=2 SV=1                          |
| Chitinase               | Sb3219s002010.1 | 288.84  | 171.04 | 431.79   | Chitinase 12 OS=Oryza sativa subsp. japonica GN=Cht12 PE=2 SV=2                        |
| Chitinase               | Sb09g019660.1   | 14.04   | 8.58   | 43.63    | Chitinase 2 OS=Oryza sativa subsp. japonica GN=Cht2 PE=1 SV=1                          |
| Chitinase               | Sb03g030100.1   | 23.76   | 21.58  | 551.50   | Acidic endochitinase OS=Vitis vinifera GN=CHIT3 PE=2 SV=1                              |
| Chitinase               | Sb01g021920.1   | 3.18    | 1.85   | 36.92    | Chitinase 2 OS=Tulipa bakeri PE=1 SV=1                                                 |
| Chitinase               | Sb05g006880.1   | 38.08   | 26.01  | 330.72   | Chitinase 1 OS=Tulipa bakeri PE=1 SV=1                                                 |
| Barwin                  | Sb05g022940.1   | 2.54    | 2.27   | 654.76   | Barwin OS=Hordeum vulgare PE=1 SV=1                                                    |
| Barwin                  | Sb05g022960.1   | 64.75   | 70.74  | 171.28   | Barwin OS=Hordeum vulgare PE=1 SV=1                                                    |
| Thaumatococin           | Sb08g022440.1   | 1.06    | 0.49   | 1092.41  | Thaumatococin-like protein OS=Oryza sativa subsp. japonica GN=Os12g0628600 PE=1 SV=1   |
| Thaumatococin           | Sb08g022420.1   | 0.14    | 0.11   | 306.90   | Thaumatococin-like protein OS=Oryza sativa subsp. japonica GN=Os12g0628600 PE=1 SV=1   |
| Thaumatococin           | Sb01g012710.1   | 2.19    | 1.13   | 375.80   | Zeamatin OS=Zea mays GN=Zlp PE=1 SV=2                                                  |
| Thaumatococin           | Sb08g022430.1   | 0.43    | 0.14   | 220.84   | Thaumatococin-like pathogenesis-related protein 4 OS=Avena sativa GN=RASTL-4 PE=2 SV=1 |
| Thaumatococin           | Sb08g022450.1   | 2.08    | 4.01   | 216.61   | Thaumatococin-like protein OS=Oryza sativa subsp. japonica GN=Os12g0628600 PE=1 SV=1   |
| Thaumatococin           | Sb01g012700.1   | 0.09    | 0.16   | 27.09    | Protein P21 OS=Glycine max PE=1 SV=1                                                   |
| Thaumatococin           | Sb08g022400.1   | 0.26    | 0.61   | 29.36    | Thaumatococin-like protein OS=Oryza sativa subsp. japonica GN=Os12g0628600 PE=1 SV=1   |
| Thaumatococin           | Sb08g022390.1   | 2.35    | 2.04   | 45.07    | Thaumatococin-like pathogenesis-related protein 4 OS=Avena sativa GN=RASTL-4 PE=2 SV=1 |
| Thaumatococin           | Sb08g022490.1   | 0.00    | 0.00   | 23.92    | Thaumatococin-like protein OS=Oryza sativa subsp. japonica GN=Os12g0628600 PE=1 SV=1   |
| Thaumatococin           | Sb02g037350.1   | 27.98   | 44.28  | 165.83   | Zeamatin OS=Zea mays GN=Zlp PE=1 SV=2                                                  |
| Thaumatococin           | Sb08g022410.1   | 42.74   | 50.95  | 59.86    | Thaumatococin-like protein OS=Oryza sativa subsp. japonica GN=Os12g0628600 PE=1 SV=1   |
| Bet v I allergen        | Sb01g037970.1   | 1.98    | 2.24   | 689.78   | Pathogenesis-related protein 1 OS=Asparagus officinalis GN=PR1 PE=2 SV=1               |
| Bet v I allergen        | Sb01g037920.2   | 0.08    | 0.22   | 186.11   | Pathogenesis-related protein 1 OS=Asparagus officinalis GN=PR1 PE=2 SV=1               |
| Bet v I allergen        | Sb01g037940.1   | 0.12    | 0.16   | 136.58   | Pathogenesis-related protein 1 OS=Asparagus officinalis GN=PR1 PE=2 SV=1               |
| Bet v I allergen        | Sb01g037920.1   | 0.06    | 0.45   | 126.68   | Pathogenesis-related protein 1 OS=Asparagus officinalis GN=PR1 PE=2 SV=1               |
| Bet v I allergen        | Sb01g037960.1   | 2.11    | 0.77   | 234.21   | Pathogenesis-related protein 1 OS=Asparagus officinalis GN=PR1 PE=2 SV=1               |
| Bet v I allergen        | CUFF.3050.2     | 0.15    | 0.11   | 65.60    | Pathogenesis-related protein 1 OS=Asparagus officinalis GN=PR1 PE=2 SV=1               |
| Bet v I allergen        | Sb01g037950.1   | 1.92    | 0.96   | 80.99    | Pathogenesis-related protein 1 OS=Asparagus officinalis GN=PR1 PE=2 SV=1               |
